1        **Development and Application of Cas13a-based Diagnostic Assay for *Neisseria***  
2                    ***Gonorrhoeae* Detection and Identification of Azithromycin Resistance**

3    Hao Luo<sup>1, #</sup>, Wentao Chen<sup>1, #</sup>, Zhida Mai<sup>1</sup>, Xiaomian Lin<sup>1</sup>, Jianjiang Yang<sup>1</sup>, Lihong Zeng<sup>1</sup>,  
4    Yuying Pan<sup>1</sup>, Qinghui Xie<sup>2</sup>, Qingqing Xu<sup>2</sup>, Xiaoxiao Li<sup>3</sup>, Yiwen Liao<sup>1</sup>, Zhanqin Feng<sup>1</sup>,  
5    Jiangli Ou<sup>1</sup>, Xiaolin Qin<sup>1</sup>, Heping Zheng<sup>1, \*</sup>

6    **Affiliations:**

7    1. Dermatology Hospital, Southern Medical University, Guangzhou, China, 510091

8    2. Anhui Medical University, Hefei, China, 230022

9    3. Medical College of China Three Gorges University, Yichang, China, 443002

10   # Hao Luo and Wentao Chen contributed equally to this work. Author order was  
11   determined by drawing straws.

12   \* Corresponding authors: Heping Zheng, [zhpf@hotmail.com](mailto:zhpf@hotmail.com)

13   **Running title:** *SHERLOCK for Neisseria Gonorrhoeae molecular diagnosis*

14

15   **Keywords:**

16   *Neisseria Gonorrhoeae*, SHERLOCK, CRISPR/Cas13a, molecular diagnosis,

17   azithromycin resistance identification

18 **Abstract**

19 Gonorrhea caused by *Neisseria gonorrhoeae* has spread world-wide.  
20 Antimicrobial-resistant strains have emerged to an alarming level to most antibiotics,  
21 including to the ceftriaxone-azithromycin combination, currently recommended as  
22 first-line dual therapy. Rapid testing for antimicrobial resistance will contribute to clinical  
23 decision-making for rational drug use and will slow this trend. Herein, we developed a  
24 Cas13a-based assay for *N. gonorrhoeae* detection (*porA* target) and azithromycin  
25 resistance identification (A2059G and C2611T point mutations). We evaluated the  
26 sensitivity and specificity of this method, and 10 copies per reaction can be achieved in  
27 *porA* detection and C2611T identification, with no cross-reactions. Comparison of the  
28 Cas13a-based assay (*porA* target) with Roche Cobas 4800 assay (n=23 urine samples)  
29 revealed 100% concordance. Isolated *N. gonorrhoeae* strains were used to validate the  
30 identification of A2059G and C2611T resistance mutations. All tested strains (8 A2059G  
31 strains, 8 C2611T strains, and 8 wild-type strains) were successfully distinguished by our  
32 assay and verified by testing MIC for azithromycin and sequencing the 23S rRNA gene.  
33 We adopted lateral flow for the SHERLOCK assay readout, which showed a visible  
34 difference between test group and NC group results. To further evaluate the capability of  
35 our assay, we tested 27 urethral swabs from patients with urethritis for *N. gonorrhoeae*  
36 detection and azithromycin-resistance identification. Of these, 62.96% (17/27) strains

37 were detected with no mutant strains and confirmed by sequencing. In conclusion, the  
38 novel Cas13a-based assay for rapid and accurate *N. gonorrhoeae* detection combined  
39 with azithromycin drug resistance testing is a promising assay for application in clinical  
40 practice.

41

## 42 **Introduction**

43 Gonorrhea is a common bacterial sexually transmitted infection (STI) in the world,  
44 caused by *Neisseria gonorrhoeae* [1]. As estimated by the World Health Organization  
45 (WHO), there were 78 million global cases in 2012 and 86.9 million cases in 2016  
46 worldwide [2, 3]. The prevalence of *N. gonorrhoeae* has increased rapidly and remains a  
47 public health concern. In the absence of an effective vaccine, antibiotic treatment is  
48 critical to cure and slow the spread of *N. gonorrhoeae* infections [4, 5]. However, due to  
49 the use and abuse of antibiotics, antimicrobial resistance (AMR) of *N. gonorrhoeae* has  
50 emerged to all first-line therapeutic drugs used to date [4-7]. In particular, AMR to  
51 azithromycin and ceftriaxone currently used as first-line dual therapy has been reported  
52 as a cause of treatment failure in both the United Kingdom and Australia [8, 9], and the  
53 resistance has shown a gradual increasing trend according to the gonococcal surveillance  
54 program data from Europe and the United States [10, 11]. There is, therefore, a need for  
55 clinicians to rapidly acquire resistance data for antibiotics, which could help manage

56 rational drug use and further slow the development of drug resistance.

57

58 Traditional antimicrobial resistance detection methods are mainly culture-based. The

59 quantitative agar dilution method which can determine the minimum inhibitory

60 concentration (MIC) of antimicrobials is recognized as the ‘gold standard’ method, but

61 complicated protocol steps and long turnaround times hinder its development to satisfy

62 clinical requirements [1, 6]. To achieve this goal, non-culture-based nucleic acid

63 amplification tests (NAATs) have been introduced and are being developed. Sequencing

64 technology has been widely used to identify plasmid-mediated or

65 chromosomally-mediated drug resistance to discover antimicrobial resistance towards

66 penicillin, ciprofloxacin, tetracycline, azithromycin, extended-spectrum cephalosporin,

67 and multidrug resistance [6, 12]. With the discovery of a strong correlation between

68 single nucleotide polymorphisms (SNP) and drug resistance in *N. gonorrhoeae*, more

69 convenient assays have been established [13-17]. These methods generally use PCR to

70 amplify target genes, and combine with specific probes, high resolution melting (HRM)

71 analysis, or mass spectrometry to differentiate specific point mutations. The protocol is

72 time-saving, however, large precision instruments are necessary to ensure accurate

73 temperature control and results also require skilled evaluation.

74

75 Cas13a was first described by Zhang et al. and exploits endonuclease activity of target  
76 RNA and collateral cleavage activity of the target sequence [18]. Based on this principle,  
77 the SHERLOCK (specific high-sensitivity enzymatic reporter unlocking) was developed,  
78 which combines recombinase polymerase amplification (RPA) and Cas13a in an  
79 isothermal system with single molecule sensitivity, high specificity, single-base  
80 resolution, and convenient acquisition of results [19]. Given the advantages of this  
81 technology, SHERLOCK is becoming a potential tool for rapid diagnostic testing of  
82 emerging infectious diseases, and has been developed for the diagnosis of *Plasmodium*,  
83 SARS-CoV-2, Ebola virus, and Lassa virus [20-22]. Thus, this robust Cas13a-based  
84 diagnostic tool may satisfy the requirements of *N. gonorrhoeae* detection and antibiotic  
85 resistant-SNPs identification in clinical practice.

86

87 Azithromycin combined with ceftriaxone is the currently recommended treatment for *N.*  
88 *gonorrhoeae* given the increasing MIC of ceftriaxone [23] and the emergence of  
89 high-level azithromycin resistance strains in various geographical regions showing a  
90 tendency to spread to other areas [24-30]. The main cause of elevated azithromycin  
91 resistance has been highly correlated with A2059G and C2611T mutations in the 23S  
92 rRNA subunit of the bacterial ribosome [31-33]. Herein, we attempt to develop and apply  
93 this Cas13a-based method to develop a rapid and accurate assay for *N. gonorrhoeae*

94 detection and azithromycin resistance identification that will contribute to rational drug  
95 use by clinicians.

96

## 97 **Materials and Methods**

### 98 **Ethics approval**

99 All human samples used for this study were evaluated and approved by the Ethics  
100 Review Committee at Dermatology Hospital of Southern Medical University (2020056).

### 101 **Culture and azithromycin susceptibility testing**

102 The *N. gonorrhoeae* strains used to verify azithromycin resistance were isolated from  
103 clinical samples of patients from Guangzhou, China and were identified by Gram  
104 Staining, oxidase, catalase, and sugar fermentation tests. Isolates were cultured in  
105 Thayer-Martin medium and incubated in 5% CO<sub>2</sub> in a 37°C incubator.

106 Antimicrobial susceptibility to azithromycin was tested using the agar dilution method,  
107 according to WHO recommendations [34]. Briefly, all strains were cultured for 18 h and  
108 adjusted to a 0.5 McFarland standard suspension, and the cultures were then multipoint  
109 inoculated onto antimicrobial agar plates containing different drug concentrations.

### 110 **Sample preparation**

111 Clinical urine samples were collected and stored at 4°C temporarily before DNA  
112 extraction. Urethral swabs were collected and stored in DNA/RNA Shield (Zymo  
113 Research; R1100-250) and 4°C for temporary storage before DNA extraction. Genome

114 DNA extraction was carried out using the HiPure Bacterial DNA Kit (Magen; D3146-02)  
115 according to the manufacturer's instructions. Extracted genomic DNA was stored at -20°C  
116 until use.

117 Clinical urine specimens for Roche COBAS 4800 NG/CT tests were prepared according  
118 to Roche's standard operation protocols.

119 Serial dilutions of dsDNA (porA, A2059G, C2611T) were prepared by using Q5  
120 High-Fidelity DNA Polymerases (New England Biolabs; M0492S) to amplify the target  
121 gene in a total reaction volume of 50 µL (25 µL of 2× Master Mix, 2.5 µL of each 10  
122 µM primer, 2 µL of DNA template, and 18 µL ddH<sub>2</sub>O). PCR was performed as follows:  
123 initial denaturation at 98°C for 30 s, then 35 cycles at 98°C for 10 s, 60°C for 20 s, and 72°C  
124 for 30 s, followed by 72°C for 2 min. After amplification, PCR products were verified  
125 and purified following agarose gel electrophoresis. The Universal DNA purification kit  
126 (TIANGEN; DP214) was used according to the manufacturer's protocol to extract target  
127 DNA from agarose gel. Purified dsDNA was quantified using the Qubit dsDNA HS  
128 Assay Kit (ThermoFisher; Q33230) and stored at -20°C until use. PCR primers used to  
129 produce dsDNA are reported in **Table S2**.

### 130 **Protein expression and purification of Cas13a**

131 LwCas13a expression and purification were carried out according to the protocols  
132 described by Zhang et al. with some modifications [35]. Briefly, LwCas13a expression  
133 vectors (NovoPro Bioscience; V010159) were transformed into Rosetta (DE3) Competent

134 Cells (Tiangen; CB108). Competent cells containing LwCas13a vectors were inoculated  
135 into LB Broth media (Sangon Biotech; A507002) containing 50 µg/mL ampicillin  
136 (Sangon Biotech; A100339) and grown at 37°C, 220 rpm until the OD600 reached 0.6.  
137 Isopropyl-beta-D-thiogalactopyranoside (Sangon Biotech; B541007) was added to the  
138 media at a final concentration of 0.5 mM to induce protein expression. Cells were then  
139 centrifuged at 4°C, and cell pellets were harvested and stored at -80°C for further  
140 purification.

141 Protein purification was performed at 4°C. Cell pellets were crushed and purified with  
142 His-tag Protein Purification Kit (Beyotime Biotechnology; P2226). Then incubated at 25°C  
143 for 3 h with SUMO protease (Novoprotein; PE007-01A) to digest SUMO tag. Purified  
144 Cas13a protein was stored at -80°C in storage buffer (50 mM Tris, 600 mM NaCl, 5%  
145 glycerol, 2 mM DTT, pH 7.5). All purification steps were analyzed and confirmed by  
146 SDS-PAGE and Coomassie Blue staining (Sangon Biotech; C510041). The concentration  
147 of protein was quantified using the BCA Protein Assay Kit (Beyotime Biotechnology;  
148 P0012S).

#### 149 **crRNA preparation**

150 For crRNA preparation, oligonucleotides containing the T7 promoter sequence, spacers  
151 (complement to target RNA), and the crRNA core sequence (bind to Cas13a) were  
152 designed by SnapGene 4.1.9 and NCBI BLAST, and synthesized by Sangon Biotech.  
153 Synthetic ssDNA (100 µM) binds to short T7 primer sequence (100 µM) by gradient



154 annealing from 95°C to 25°C with cooling rate of 0.1°C/s. The product was then  
155 transcribed to crRNA using HiScribe T7 Quick High Yield RNA Synthesis kit (New  
156 England Biolabs; E2050S) incubating at 37°C overnight. Transcribed crRNA was  
157 purified using RNA XP Clean Beads (Beckman; A63987), and the concentration was  
158 quantified using the Qubit RNA HS Assay Kit (ThermoFisher; Q32852). crRNA was  
159 stored at -20°C until use. All crRNA used in this study are reported in **Table S2**.

### 160 **Recombinase Polymerase Amplification**

161 Recombinase Polymerase Amplification (RPA) primers were designed by SnapGene  
162 4.1.9 and NCBI BLAST according to the TwistAmp Assay Design Manual instructions,  
163 which can be downloaded from the official website  
164 (<https://www.twistdx.co.uk/en/support/manuals/twistamp-manuals>), with the condition  
165 that primers must flank the crRNA target region. RPA primers were synthesized by  
166 Sangon Biotech. The forward primer contained the T7 promoter sequence for initiating  
167 the transcription. TwistAmp Basic (TwistDx; TABAS03KIT) was used to amplify the  
168 target DNA. In a total reaction volume of 25 µL (containing 1.2 µL of each 10 µM primer,  
169 14.75 µL of rehydration buffer, 1.25 µL of Magnesium Acetate (MgOAc), 1 µL of input,  
170 and 5.6 µL ddH<sub>2</sub>O). The mixture was run at 37°C for 2 h and then subjected to Cas13a  
171 detection assays. All RPA primers used in this study are available in **Table S2**.

### 172 **LwCas13a collateral detection**

173 Cas13a detection assays were mainly performed according to the protocol described by

174 Zhang et al. [19]. Briefly, the assay was carried out in a 25  $\mu$ L reaction volume consisting  
175 of 40 mM Tris-HCl (pH7.5), 9 mM MgCl<sub>2</sub>, 1 mM rNTPs (New England Biolabs;  
176 N0466L), 50 U RNase inhibitor (New England Biolabs; M0314L), 37.5 U T7 RNA  
177 Polymerase (New England Biolabs; M0251L), 225 nM crRNA, 45nM purified LwCas13a,  
178 125 nM RNA reporter (5'-6FAM-UUUUU-BHQ1-3' as described by Gootenberg et  
179 al.[36]), and 1.25  $\mu$ L RPA reaction solution was added to the above mixture. The reaction  
180 mixture was allowed to incubate at 37°C for 3 h in a 96-Well Half-Area Microplate  
181 (Corning; CLS3694-100EA). Fluorescence emission (excitation 490 nm/detection 520  
182 nm) was tested every 5 min.

### 183 **Lateral flow readout**

184 The lateral flow dipstick (Milenia Biotec; MGH1) was used to acquire the results of  
185 Cas13a collateral cleavage, which was based on the cleavage of the FITC-RNA-Biotin  
186 reporter. It basically replaces the RNA reporter used in the system described above, with  
187 a new RNA reporter (5'-FITC-UUUUUUUUUUUUUU-Biotin-3' described by Myhrvold  
188 et al. [37]), and then was subjected to the same process. Subsequently, a 20  $\mu$ L volume of  
189 Cas13a detection solution was added and the reaction mixture was incubated at 37°C for  
190 3h in 80  $\mu$ L dipstick buffer, with thorough mixing. A lateral flow dipstick was inserted  
191 into the mixture to obtain the results.

### 192 **Sanger sequencing**

193 The 23s rRNA gene of *N. gonorrhoeae*, which contains the A2059G and C2611T point

194 mutations, was amplified using the Q5 High-Fidelity DNA Polymerases (New England  
195 Biolabs; M0492S). In a 25  $\mu$ L reaction volume, comprised of 12.5  $\mu$ L of 2x Master Mix,  
196 1.25  $\mu$ L of each 10  $\mu$ M primer, 1  $\mu$ L of input, and 8  $\mu$ L ddH<sub>2</sub>O. PCR was performed as  
197 follows: initial denaturation at 98°C for 30 s, then 35 cycles of 98°C for 10 s, 64°C for 20  
198 s, and 72°C for 30 s, followed by 72°C for 2 min. PCR products were verified by Sanger  
199 sequencing (Sangon Biotech). The results of sequencing were blasted in SnapGene 4.1.9.  
200 PCR primers are available in **Table S2**.

#### 201 **Analysis of fluorescence data**

202 Prism 8 software (GraphPad, La Jolla, CA, USA) was used for visualization of results  
203 and data analyses. Data are presented as mean  $\pm$  SEM and were tested for normality with  
204 the Shapiro-Wilk test. Differences were considered significant at  $P$ -values  $< 0.05$ .

205

#### 206 **Results**

#### 207 **Schematic of Cas13a based *N. gonorrhoeae* detection and azithromycin resistance** 208 **identification**

209 The SHERLOCK assay was performed as established by Zhang et al. [19], and combined  
210 RPA and Cas13a to create an isothermal detection system. The target sequence was  
211 amplified by RPA, and the T7 promoter was appended to the front of the RPA product as  
212 the template to be used to initiate subsequent RNA transcription. Synthetic crRNA guided

213 the Cas13a protein to recognize the specific target and enable its RNA cleavage and  
214 collateral cleavage activities (**Fig. 1**) [18]. For *N. gonorrhoeae* detection, we selected  
215 porA as the target as was frequently used to identify *N. gonorrhoeae* in other methods [17,  
216 38-40]. Based on the characteristics of its single-base resolution, we constructed two  
217 crRNA sequences that could identify A2059G and C2611T separately. Although a single  
218 synthetic mismatch of crRNA pairing to the target enabled the assay to identify the  
219 A2059G mutation (**Fig. S1A**), this design failed to achieve the identical results for the  
220 detection of the C2611T mutation. Thus, we introduced one more synthetic mismatch of  
221 crRNA for C2611T mutation testing (**Fig. S1B-D**). Both crRNA designs were  
222 successfully utilized for 23s rRNA mutations detection.

### 223 **Evaluation of the Cas13a-based method with sensitivity and specificity**

224 To determine the sensitivity of the *N. gonorrhoeae* detection and azithromycin resistance  
225 identification assay, we prepared serial dilutions of dsDNA template, ranging from  $10^0$   
226 copy/ $\mu$ L to  $10^5$  copies/ $\mu$ L (**Table 1**). The RPA step included the addition of 1  $\mu$ L input of  
227 dsDNA template, which was then transferred to the mixture for Cas13a detection.  
228 Detection of 10 copies/ $\mu$ L was achieved for porA and C2611T identification (**Fig. S2A,**  
229 **S2E**). For A2059G identification, the detection limit was an order of magnitude lower, at  
230 about  $10^2$  copies/ $\mu$ L (**Fig. S2C**). We further evaluated the specificity of the assay using a  
231 panel of urogenital tract pathogenic bacteria (n=12) and *Neisseria meningitides* (**Table 2**).

232 No cross-reactivity was observed for both *N. gonorrhoeae* detection and azithromycin  
233 resistance identification (**Fig. S2B, S2D, S2F**). All RPA primers and crRNA sequences  
234 had been confirmed by BLAST before we tested its specificity. The SHERLOCK exhibits  
235 robust capability for *N. gonorrhoeae* detection and azithromycin resistance identification.

### 236 **Validation of *N. gonorrhoeae* detection in clinical urine samples**

237 Twenty-three clinical urine samples with low concentrations previously tested using the  
238 standard procedure of the Roche Cobas 4800 NG/CT test were used to validate the  
239 performance of SHERLOCK. DNA was extracted from urine samples after centrifugation  
240 and a maximum volume of 6.6  $\mu$ L of DNA was amplified by RPA, followed by Cas13a  
241 detection. The method was repeated using 3 technical replicates and the fluorescence  
242 signal of each sample was normalized against the negative controls. Using this method, a  
243 total of 12 of 23 positive samples were detected, showing a 100% coincidence rate with  
244 the Roche assay (**Fig. 2**). The fluorescence signals of 3 samples (samples 3, 6, 10) were  
245 weaker than other specimens, but still could be distinguished with the negative control.

### 246 **Validation of azithromycin resistance identification**

247 A2059G mutant strains (n=8), C2611T mutant strains (n=8), and wild-type strains (n=8)  
248 isolated from clinical specimens were used to validate Cas13a-based SNPs detection. We  
249 measured the MICs of azithromycin in each strain and sequenced their 23S rRNA gene  
250 (**Fig. 3, 4**). Strains containing either the A2059G or C2611T point mutation were more

251 likely to be a high-level azithromycin-resistant strain. Of the 8 A2059G isolated strains,  
252 all 8 strains had MICs of  $>1$  mg/L, and 5 A2059G strains had MICs  $\geq 512$  mg/L. Of the 8  
253 C2611T isolated strains, 7 had MICs of  $>1$  mg/L and 3 C2611T strains had MICs  $\geq 512$   
254 mg/L. Compared with mutant strains, the wild-type strains possessed lower MICs,  
255 corresponding to  $\leq 1$  mg/L in 7 strains and the MIC of the remaining strain was 4 mg/L,  
256 which was above the average MICs of all mutant strains. We extracted DNA of all  
257 mutant and wild-type strains to validate this Cas13a-based assay. Paired with A2059G  
258 crRNA or C2611T crRNA, this assay successfully differentiated all 8 A2059G mutant  
259 strains and 8 C2611T strains from 8 wild-type strains (**Fig. 3, 4**). Sixteen strains  
260 harboring A2059G and C2611T mutations were identified by exhibiting a higher  
261 fluorescence intensity than wild-type strains by our assay (**Fig. S3A, S3B**). Thus, we  
262 successfully applied Cas13a based assay in azithromycin resistance identification.

### 263 **Lateral flow for *N. gonorrhoeae* detection and azithromycin resistance identification**

264 We applied lateral flow to provide a more convenient readout tool. The FAM and BHQ1  
265 markers in the RNA reporter were replaced by FITC and Biotin. Compared to the  
266 fluorescent intensity detection, the lateral flow is inserted directly into the reaction liquid  
267 instead of using a specific device or instrument for the readout of results. The lateral flow  
268 contains a control band and a test band. Generally, a positive test will show only one test  
269 band or two bands (test band and control band), due to its different cleavage efficiency

270 which will result in varying amounts of cleaved RNA reporter captured by the antibody  
271 in the test band. We tested lateral flow for porA detection, A2059G identification, and  
272 C2611T identification separately (**Fig. 5A-C**). Three positive groups generated visual  
273 signals in the test bands, while all wild-type groups and the no-input group only showed a  
274 single control band.

### 275 **Applying Cas13a based *N. gonorrhoeae* detection and azithromycin resistance** 276 **identification in urethritis**

277 To confirm the efficacy of the assay in clinical specimens. We collected 27 urethral  
278 swabs from patients with urethritis requiring differential diagnosis for potential  
279 gonococcal infection and to determine whether azithromycin was still effective and this  
280 information is important for the clinician. We extracted DNA from urethral swabs  
281 directly and then tested all 27 samples with the SHERLOCK assay (**Fig. 6**). Overall,  
282 62.96% (17/27) samples showed porA positivity, and the fluorescence intensity of 17  
283 samples was higher than that of the negative samples and the no-input group. We further  
284 tested for azithromycin resistance with A2059G crRNA and C2611T crRNA, and no  
285 mutant strain was discovered in the 17 porA positive samples. For 27 specimens, we  
286 sequenced the 23S rRNA gene and the results showed a 100% coincidence rate with our  
287 assay (**Table S1**). Sequencing data demonstrated that 17 porA positive samples were  
288 wild-type strains and no signals were detected in 10 porA negative samples.

289

## 290 **Discussion**

291 Antimicrobial resistance is the largest concern in the treatment of gonorrhea, with its  
292 decreasing susceptibility to antibiotics used in previous or current treatment approaches  
293 [5]. Treatment failures have been reported to the current first-line drug combination of  
294 azithromycin and ceftriaxone [8, 9], and represent a significant treatment challenge to  
295 clinicians. Rapid information regarding antimicrobial resistance would be beneficial to  
296 rational drug use in the clinic and would slow this growing trend. Traditional  
297 culture-based drug resistance methods have been widely used in the clinical laboratory  
298 and are of great importance in antimicrobial resistance surveillance, although the testing  
299 is time-consuming and is unable to meet clinical requirements rapidly [41]. Newly  
300 NAATs-based assays may overcome some of the disadvantages of culture-based methods  
301 and can be applied to identify antimicrobial resistance associated mutations  
302 simultaneously. Current molecular methods to identify mutations are mainly based on  
303 specially designed probes, HRM analysis, and mass spectrometry [13, 16, 17]. Compared  
304 with culture-based antimicrobial resistance detection methods, these methods effectively  
305 shorten assay times, but still present several limitations. If the alteration in gene has little  
306 impact on T<sub>m</sub> values or GC content, for example, C to G variations, the method would be  
307 invalidated, moreover, short insertions or deletions may make the method unreliable [17,



308 42]. Furthermore, these assays are essentially PCR-based and require PCR amplification  
309 instruments coupled with other detection equipment, which limits the convenience and  
310 flexibility of the assay. Thus, the development of an assay with ultra-high resolution is  
311 desired for distinguishing mutant from the wild-type.

312

313 CRISPR/Cas molecular diagnostics have been developed and applied for testing various  
314 organisms, including SARS-CoV-2, HPV, Zika virus, Dengue virus, Ebola virus, and  
315 plasmodium [20, 21, 37, 43, 44]. Benefiting from its high specificity, sensitivity, and  
316 ability to identify SNP with the isothermal process, we have adopted a Cas13a-based  
317 strategy for *N. gonorrhoeae* detection and antimicrobial resistance identification in this  
318 study. The SHERLOCK contains two nucleic acid amplification steps: DNA  
319 amplification by recombinase polymerase amplification and RNA amplification by T7  
320 transcription. With double signal amplification cycles, this strategy allowed to detect low  
321 levels of *N. gonorrhoeae*. Cross-reactivity is the major concern of currently developed  
322 diagnostic methods [12]. Attempts have been made to introduce two targets to uniquely  
323 identify a species, but this approach complicates the assay [13, 15-17]. The combination  
324 of specially-designed RPA primers and crRNA makes the whole reaction extremely  
325 specific. As expected, our assay exhibited high specificity in testing a panel of  
326 non-gonococcal bacteria. In addition, our Cas13a-based assay showed an excellent

327 concordance rate with the Roche Cobas assay currently used for clinical urine samples.  
328 With regard to SNPs detection, assay has been developed that exploits CRISPR/Cas13a  
329 technology to recognize single point mutations [19, 36, 45]. Our Cas13a-based assay  
330 achieved a sensitivity of 10 copies per reaction, which is more sensitive than previous  
331 HRM-based assays [46]. The diagnostic capability of the Cas13a-based assay has also  
332 been examined by testing clinical isolates harboring the SNP mutation. This isothermal  
333 assay which relies on a reaction temperature of 37°C over the entire process without  
334 complex equipment has a great potential to be applied as a POCT device.

335

336 Azithromycin is a widely used macrolide antimicrobial agent and primarily acts on  
337 domain V of the 23S rRNA gene. Previous studies and our observation have revealed that  
338 *N. gonorrhoeae* strains harboring A2059G and C2611T mutations in the 23s rRNA gene  
339 are strongly associated with high-level azithromycin resistance [28, 32, 33, 47-49].  
340 Sixteen *N. gonorrhoeae* isolates containing 23s rRNA mutations were utilized to evaluate  
341 the performance of our assay. The results showed that our Cas13a-based assay could  
342 provide drug resistance information in real-time. We also tested a small number of  
343 urethral swabs collected from the clinic in Guangzhou, China. In porA-positive(17/27)  
344 urethral swabs from patients with urethritis, no 23s rRNA mutant was identified, which is  
345 consistent with previous reports, indicating that the high-level azithromycin-resistant *N.*

346 *gonorrhoeae* has not widely spread in Guangzhou, China [14, 16, 17]. Because of the  
347 ongoing use of ceftriaxone and azithromycin dual therapy, the surveillance of 23s rRNA  
348 mutation is still a requirement.

349

350 There are several limitations to our study. We only tested a small number of samples and  
351 limited sources of clinical specimen. Cervical, anus, and pharynx specimens should be  
352 considered in further study. Moreover, the cost of SHERLOCK is higher than  
353 HRM-based method, though lower than most reported assays to date. In summary, we  
354 developed a CRISPR/Cas13a-based assay for *N. gonorrhoeae* detection and azithromycin  
355 resistance identification with great potential for providing drug resistance information to  
356 assist clinical diagnosis and treatment.

357

### 358 **Acknowledgments**

359 This work was supported by grants from the Overseas Famous Teacher Project of  
360 Guangdong Provincial Department of Science and Technology (No. 2020A1414010136),  
361 Medical Science and Technology Research Foundation of Guangdong Province (No.  
362 A2019010 and No. A2021139), Guangdong Traditional Chinese Medicine Research  
363 Project (No. 20191230 and No. 20211277), Guangdong Provincial Medical Research

364 Fund (No. B2020149), Scientific Research Initiative Project of Southern Medical  
365 University (Project of Youth Science and Technology Personnel Training, No.  
366 PY2018N100), Key scientific research platforms and research projects of colleges and  
367 universities in Guangdong Province (No. 2018KQNCX025). The funders had no role in  
368 study design, data collection and analysis, decision to publish, or preparation of the  
369 manuscript.

370

#### 371 **Author contributions**

372 Conceived and designed the study: HL and HPZ. Collected samples: ZDM, XML, JJY,  
373 JLO, QQX, and ZQF. Isolation of clinical strains: LHZ, YYP, QHX. Tested  
374 Susceptibility to azithromycin: XML, XXL, and YWL. Performed the laboratory work:  
375 HL. Analyzed the data: HL and WC. Wrote the initial draft of the paper: HL and WC.  
376 Funding supported the study: XLQ, XML, and HPZ. All authors viewed and contributed  
377 to the final paper.

378

#### 379 **Competing interests**

380 The authors declare no interest of conflicts.

381

382 **Reference**

- 383 1. Unemo M, Seifert HS, Hook EW, 3rd, Hawkes S, Ndowa F, Dillon JR.  
384 Gonorrhoea. *Nat Rev Dis Primers* **2019**; 5(1): 79.
- 385 2. Rowley J, Vander Hoorn S, Korenromp E, et al. Chlamydia, gonorrhoea,  
386 trichomoniasis and syphilis: global prevalence and incidence estimates, 2016. *Bull*  
387 *World Health Organ* **2019**; 97(8): 548-62p.
- 388 3. Newman L, Rowley J, Vander Hoorn S, et al. Global Estimates of the Prevalence  
389 and Incidence of Four Curable Sexually Transmitted Infections in 2012 Based on  
390 Systematic Review and Global Reporting. *PLoS One* **2015**; 10(12): e0143304.
- 391 4. Rice PA, Shafer WM, Ram S, Jerse AE. *Neisseria gonorrhoeae*: Drug Resistance,  
392 Mouse Models, and Vaccine Development. *Annu Rev Microbiol* **2017**; 71:  
393 665-86.
- 394 5. Suay-García B, Pérez-Gracia MT. Future Prospects for *Neisseria gonorrhoeae*  
395 Treatment. *Antibiotics (Basel)* **2018**; 7(2).
- 396 6. Unemo M, Shafer WM. Antimicrobial resistance in *Neisseria gonorrhoeae* in the  
397 21st century: past, evolution, and future. *Clin Microbiol Rev* **2014**; 27(3):  
398 587-613.
- 399 7. WHO Guidelines Approved by the Guidelines Review Committee. WHO  
400 Guidelines for the Treatment of *Neisseria gonorrhoeae*. Geneva: World Health  
401 Organization Copyright World Health Organization 2016., **2016**.
- 402 8. Eyre DW, Sanderson ND, Lord E, et al. Gonorrhoea treatment failure caused by a  
403 *Neisseria gonorrhoeae* strain with combined ceftriaxone and high-level  
404 azithromycin resistance, England, February 2018. *Euro Surveill* **2018**; 23(27).
- 405 9. Whiley DM, Jennison A, Pearson J, Lahra MM. Genetic characterisation of  
406 *Neisseria gonorrhoeae* resistant to both ceftriaxone and azithromycin. *Lancet*  
407 *Infect Dis* **2018**; 18(7): 717-8.
- 408 10. Gonococcal antimicrobial susceptibility surveillance in Europe, 2018. Available  
409 at:  
410 <https://www.ecdc.europa.eu/en/publications-data/gonococcal-antimicrobial-susce>  
411 [ptibility-surveillance-europe-2018](https://www.ecdc.europa.eu/en/publications-data/gonococcal-antimicrobial-susce). Accessed April.
- 412 11. Sexually Transmitted Disease Surveillance 2018. Available at:  
413 <https://www.cdc.gov/std/stats18/gisp2018/default.htm>. Accessed April.
- 414 12. Donà V, Low N, Golparian D, Unemo M. Recent advances in the development  
415 and use of molecular tests to predict antimicrobial resistance in *Neisseria*  
416 *gonorrhoeae*. *Expert Rev Mol Diagn* **2017**; 17(9): 845-59.
- 417 13. Li Y, Xiu L, Liu J, et al. A multiplex assay for characterization of antimicrobial  
418 resistance in *Neisseria gonorrhoeae* using multi-PCR coupled with mass  
419 spectrometry. *J Antimicrob Chemother* **2020**; 75(10): 2817-25.

- 420 14. Trembizki E, Buckley C, Donovan B, et al. Direct real-time PCR-based detection  
421 of *Neisseria gonorrhoeae* 23S rRNA mutations associated with azithromycin  
422 resistance. *J Antimicrob Chemother* **2015**; 70(12): 3244-9.
- 423 15. Donà V, Smid JH, Kasraian S, et al. Mismatch Amplification Mutation  
424 Assay-Based Real-Time PCR for Rapid Detection of *Neisseria gonorrhoeae* and  
425 Antimicrobial Resistance Determinants in Clinical Specimens. *J Clin Microbiol*  
426 **2018**; 56(9).
- 427 16. Peterson SW, Martin I, Demczuk W, et al. Multiplex real-time PCR assays for the  
428 prediction of cephalosporin, ciprofloxacin and azithromycin antimicrobial  
429 susceptibility of positive *Neisseria gonorrhoeae* nucleic acid amplification test  
430 samples. *J Antimicrob Chemother* **2020**; 75(12): 3485-90.
- 431 17. Xiu L, Li Y, Wang F, et al. Multiplex High-Resolution Melting Assay for  
432 Simultaneous Identification of Molecular Markers Associated with  
433 Extended-Spectrum Cephalosporins and Azithromycin Resistance in *Neisseria*  
434 *gonorrhoeae*. *J Mol Diagn* **2020**.
- 435 18. Abudayyeh OO, Gootenberg JS, Konermann S, et al. C2c2 is a single-component  
436 programmable RNA-guided RNA-targeting CRISPR effector. *Science* **2016**;  
437 353(6299): aaf5573.
- 438 19. Gootenberg JS, Abudayyeh OO, Lee JW, et al. Nucleic acid detection with  
439 CRISPR-Cas13a/C2c2. *Science* **2017**; 356(6336): 438-42.
- 440 20. Lee RA, Puig H, Nguyen PQ, et al. Ultrasensitive CRISPR-based diagnostic for  
441 field-applicable detection of *Plasmodium* species in symptomatic and  
442 asymptomatic malaria. *Proc Natl Acad Sci U S A* **2020**; 117(41): 25722-31.
- 443 21. Barnes KG, Lachenauer AE, Nitido A, et al. Deployable CRISPR-Cas13a  
444 diagnostic tools to detect and report Ebola and Lassa virus cases in real-time. *Nat*  
445 *Commun* **2020**; 11(1): 4131.
- 446 22. Joung J, Ladha A, Saito M, et al. Detection of SARS-CoV-2 with SHERLOCK  
447 One-Pot Testing. *N Engl J Med* **2020**; 383(15): 1492-4.
- 448 23. Update to CDC's Sexually transmitted diseases treatment guidelines, 2010: oral  
449 cephalosporins no longer a recommended treatment for gonococcal infections.  
450 *MMWR Morb Mortal Wkly Rep* **2012**; 61(31): 590-4.
- 451 24. Salmerón P, Moreno-Mingorance A, Trejo J, et al. Emergence and dissemination  
452 of three mild outbreaks of *Neisseria gonorrhoeae* with high-level resistance to  
453 azithromycin in Barcelona, 2016-18. *J Antimicrob Chemother* **2020**.
- 454 25. Holderman JL, Thomas JC, Schlanger K, et al. Sustained Transmission of  
455 *Neisseria gonorrhoeae* with High-Level Resistance to Azithromycin, Indianapolis,  
456 Indiana 2017-2018. *Clin Infect Dis* **2021**.
- 457 26. Shimuta K, Lee K, Yasuda M, et al. Characterization of two *Neisseria*  
458 *gonorrhoeae* strains with high-level azithromycin resistance isolated in 2015 and

- 459 2018 in Japan. *Sex Transm Dis* **2020**.
- 460 27. Palavecino EL, Kilic A, Schmerer MW, Dobre-Buonya O, Toler C, McNeil CJ.  
461 First Case of High-Level Azithromycin-Resistant *Neisseria gonorrhoeae* in North  
462 Carolina. *Sex Transm Dis* **2020**; 47(5): 326-8.
- 463 28. Liu YH, Wang YH, Liao CH, Hsueh PR. Emergence and Spread of *Neisseria*  
464 *gonorrhoeae* Strains with High-Level Resistance to Azithromycin in Taiwan from  
465 2001 to 2018. *Antimicrob Agents Chemother* **2019**; 63(9).
- 466 29. Gernert KM, Seby S, Schmerer MW, et al. Azithromycin susceptibility of  
467 *Neisseria gonorrhoeae* in the USA in 2017: a genomic analysis of surveillance  
468 data. *Lancet Microbe* **2020**; 1(4): e154-e64.
- 469 30. Banhart S, Selb R, Oehlmann S, et al. The mosaic *mtr* locus as major genetic  
470 determinant of azithromycin resistance of *Neisseria gonorrhoeae*, Germany, 2018.  
471 *J Infect Dis* **2021**.
- 472 31. Ng LK, Martin I, Liu G, Bryden L. Mutation in 23S rRNA associated with  
473 macrolide resistance in *Neisseria gonorrhoeae*. *Antimicrob Agents Chemother*  
474 **2002**; 46(9): 3020-5.
- 475 32. Chisholm SA, Dave J, Ison CA. High-level azithromycin resistance occurs in  
476 *Neisseria gonorrhoeae* as a result of a single point mutation in the 23S rRNA  
477 genes. *Antimicrob Agents Chemother* **2010**; 54(9): 3812-6.
- 478 33. Laumen JGE, Manoharan-Basil SS, Verhoeven E, et al. Molecular pathways to  
479 high-level azithromycin resistance in *Neisseria gonorrhoeae*. *J Antimicrob*  
480 *Chemother* **2021**.
- 481 34. Organization WH. Manual for the laboratory identification and antimicrobial  
482 susceptibility testing of bacterial pathogens of public health concern in the  
483 developing world. Available at:  
484 [http://www.who.int/csr/resources/publications/drugresist/en/IAMRmanual.pdf?u](http://www.who.int/csr/resources/publications/drugresist/en/IAMRmanual.pdf?ua=1)  
485 [a=1](http://www.who.int/csr/resources/publications/drugresist/en/IAMRmanual.pdf?ua=1).
- 486 35. Kellner MJ, Koob JG, Gootenberg JS, Abudayyeh OO, Zhang F. SHERLOCK:  
487 nucleic acid detection with CRISPR nucleases. *Nat Protoc* **2019**; 14(10):  
488 2986-3012.
- 489 36. Gootenberg JS, Abudayyeh OO, Kellner MJ, Joung J, Collins JJ, Zhang F.  
490 Multiplexed and portable nucleic acid detection platform with Cas13, Cas12a, and  
491 Csm6. *Science* **2018**; 360(6387): 439-44.
- 492 37. Myhrvold C, Freije CA, Gootenberg JS, et al. Field-deployable viral diagnostics  
493 using CRISPR-Cas13. *Science* **2018**; 360(6387): 444-8.
- 494 38. Peterson SW, Martin I, Demczuk W, et al. Molecular Assay for Detection of  
495 Genetic Markers Associated with Decreased Susceptibility to Cephalosporins in  
496 *Neisseria gonorrhoeae*. *J Clin Microbiol* **2015**; 53(7): 2042-8.
- 497 39. Shipitsyna E, Zolotoverkhaya E, Hjelmvoll SO, et al. Evaluation of six nucleic



- 498 acid amplification tests used for diagnosis of *Neisseria gonorrhoeae* in Russia  
499 compared with an international strictly validated real-time porA pseudogene  
500 polymerase chain reaction. *J Eur Acad Dermatol Venereol* **2009**; 23(11): 1246-53.
- 501 40. Bissessor M, Whiley DM, Fairley CK, et al. Persistence of *Neisseria gonorrhoeae*  
502 DNA following treatment for pharyngeal and rectal gonorrhea is influenced by  
503 antibiotic susceptibility and reinfection. *Clin Infect Dis* **2015**; 60(4): 557-63.
- 504 41. Goire N, Lahra MM, Chen M, et al. Molecular approaches to enhance  
505 surveillance of gonococcal antimicrobial resistance. *Nat Rev Microbiol* **2014**;  
506 12(3): 223-9.
- 507 42. Wittwer CT. High-resolution DNA melting analysis: advancements and  
508 limitations. *Hum Mutat* **2009**; 30(6): 857-9.
- 509 43. Chen JS, Ma E, Harrington LB, et al. CRISPR-Cas12a target binding unleashes  
510 indiscriminate single-stranded DNase activity. *Science (New York, NY)* **2018**;  
511 360(6387): 436-9.
- 512 44. Broughton JP, Deng X, Yu G, et al. CRISPR-Cas12-based detection of  
513 SARS-CoV-2. *Nat Biotechnol* **2020**; 38(7): 870-4.
- 514 45. Wang S, Li H, Kou Z, et al. Highly sensitive and specific detection of hepatitis B  
515 virus DNA and drug resistance mutations utilizing the PCR-based  
516 CRISPR-Cas13a system. *Clin Microbiol Infect* **2021**; 27(3): 443-50.
- 517 46. Donà V, Kasraian S, Lupo A, et al. Multiplex Real-Time PCR Assay with  
518 High-Resolution Melting Analysis for Characterization of Antimicrobial  
519 Resistance in *Neisseria gonorrhoeae*. *J Clin Microbiol* **2016**; 54(8): 2074-81.
- 520 47. Wind CM, Bruisten SM, Schim van der Loeff MF, Dierdorp M, de Vries HJC,  
521 van Dam AP. A Case-Control Study of Molecular Epidemiology in Relation to  
522 Azithromycin Resistance in *Neisseria gonorrhoeae* Isolates Collected in  
523 Amsterdam, the Netherlands, between 2008 and 2015. *Antimicrob Agents*  
524 *Chemother* **2017**; 61(6).
- 525 48. Ryan L, Golparian D, Fennelly N, et al. Antimicrobial resistance and molecular  
526 epidemiology using whole-genome sequencing of *Neisseria gonorrhoeae* in  
527 Ireland, 2014-2016: focus on extended-spectrum cephalosporins and azithromycin.  
528 *Eur J Clin Microbiol Infect Dis* **2018**; 37(9): 1661-72.
- 529 49. Jacobsson S, Golparian D, Cole M, et al. WGS analysis and molecular resistance  
530 mechanisms of azithromycin-resistant (MIC >2 mg/L) *Neisseria gonorrhoeae*  
531 isolates in Europe from 2009 to 2014. *J Antimicrob Chemother* **2016**; 71(11):  
532 3109-16.

533

534 **Figure legends**



535 **Fig. 1** Schematic overview of the SHERLOCK assay. Illustration of LwCas13a combined  
536 with RPA for detection of *N. gonorrhoeae*. The target gene was amplified by RPA and  
537 appended with the T7 promoter. The unpurified RPA product is added to the Cas13a  
538 system. Once crRNA was matched the transcribed RNA target, Cas13a cleaves the RNA  
539 reporter and the reporters emit a fluorescent signal.

540 **Fig. 2** Validation of the SHERLOCK assay for urine samples. The performance of  
541 SHERLOCK assay in clinical urine samples compared to verification using the Roche  
542 Cobas 4800 (NG/CT test).

543 **Fig. 3** Identification of the SHERLOCK assay for the identification of the A2059G point  
544 mutation. Sixteen *N. gonorrhoeae* strains were tested to measure their MICs for  
545 azithromycin and then assayed for 23S rRNA for 2059 and 2611 point mutations.  
546 Extracted DNA was tested by SHERLOCK assay directly.

547 **Fig. 4** Evaluation of the SHERLOCK assay for C2611T point mutation detection. Sixteen  
548 *N. gonorrhoeae* strains were evaluated to determine MICs of azithromycin and were then  
549 assayed for 23S rRNA 2059 and 2611 point mutations. Extracted DNA was tested by  
550 SHERLOCK assay directly.

551 **Fig. 5** The SHERLOCK assay using lateral flow readout for the detection of *N.*  
552 *gonorrhoeae*. (A) Lateral flow readout system applied to the SHERLOCK assay for the  
553 detection of the porA gene. (B) Lateral flow result for the detection of the A2059G point

554 mutation. (C) Lateral flow result for the detection of the C2611T point mutation.

555 **Fig. 6** Fluorescence intensity of *N. gonorrhoeae* SHERLOCK assay for the detection of  
556 gonococcal urethritis. The performance of the CRISPR/Cas13a-based assay for using  
557 urethral swab samples from patients with urethritis for identification of porA, A2059G,  
558 and C2611T.

559 **Fig. S1** Schematic diagram illustrating the crRNA design for the detection A2059G and  
560 C2611T. (A) crRNA for the identification of A2059G and one synthetic mismatches are  
561 highlighted. (B) crRNA for the identification of C2611T; one synthetic mismatches are  
562 highlighted in crRNA1 and two synthetic mismatches are highlighted in crRNA2. (C)  
563 Fluorescence intensity of crRNA1 and crRNA2 for the detection of C2611T and  
564 wild-type template (n=3 technical replicates). (D) The ratio of fluorescence intensity of  
565 C2611T to WT.

566 **Fig. S2** Sensitivity and specificity of the SHERLOCK assay for the detection of porA,  
567 A2059G, and C2611T. (A) Sensitivity of porA gene detection (n=3 technical replicates,  
568 two-tailed Student t-test; ns, not significant; \*\*, p < 0.01; \*\*\*\*, p < 0.0001; bars  
569 represent mean ± SEM). (B) Specificity of porA detection (n=3 technical replicates). (C)  
570 Sensitivity of A2059G detection (n=3 technical replicates, two-tailed Student t-test; ns,  
571 not significant; \*\*\*\*, p < 0.0001; bars represent mean ± SEM). (D) Specificity of  
572 A2059G detection (n=3 technical replicates). (E) Sensitivity of C2611T detection (n=3

573 technical replicates, two-tailed Student t-test; ns, not significant; \*\*\*,  $p < 0.001$ ; \*\*\*\*,  $p$   
574  $< 0.0001$ ; bars represent mean  $\pm$  SEM). (F) Specificity of C2611T detection (n=3  
575 technical replicates).

576 **Fig. S3** Fluorescence intensity relative to azithromycin resistance mutation strain  
577 detection. (A) Fluorescence intensity of the SHERLOCK assay for the detection of 16  
578 *Neisseria gonorrhoeae* strains (8 A2059G mutant strains and 8 wild-type strains) for  
579 A2059G detection. (n=3 technical replicates, two-tailed Student t-test; ns, not significant;  
580 \*,  $p < 0.05$ , \*\*\*,  $p < 0.001$ ; \*\*\*\*,  $p < 0.0001$ ; bars represent mean  $\pm$  SEM). (B)  
581 Fluorescence intensity of 16 *N. gonorrhoeae* strains (8 C2611T mutant strains and 8  
582 wild-type strains) for C2611T detection. (n=3 technical replicates, two-tailed Student  
583 t-test; ns, not significant; \*\*\*\*,  $p < 0.0001$ ; bars represent mean  $\pm$  SEM)

584

585

586 **Figure**

587 **Fig. 1** Schematic overview of the SHERLOCK assay.

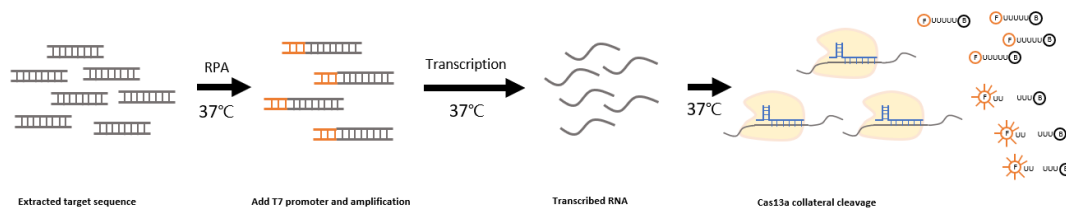

588

589

590 **Fig. 2** Validation of the SHERLOCK assay for urine samples.

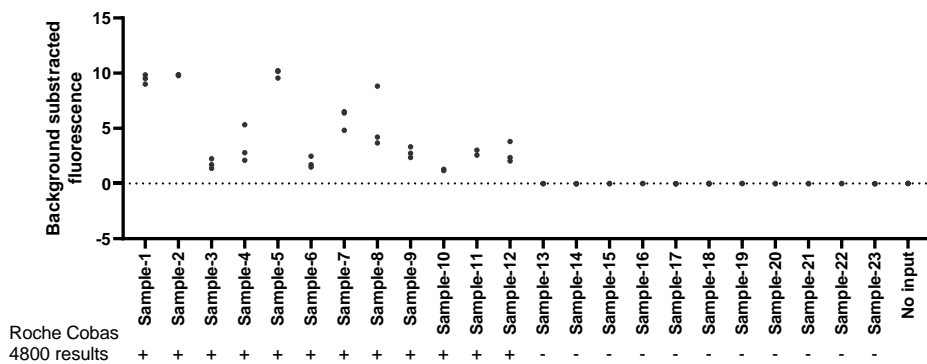

591

592

593

594

595

596

597 **Fig. 3** Identification of the SHERLOCK assay for the identification of the A2059G point

598 mutation.

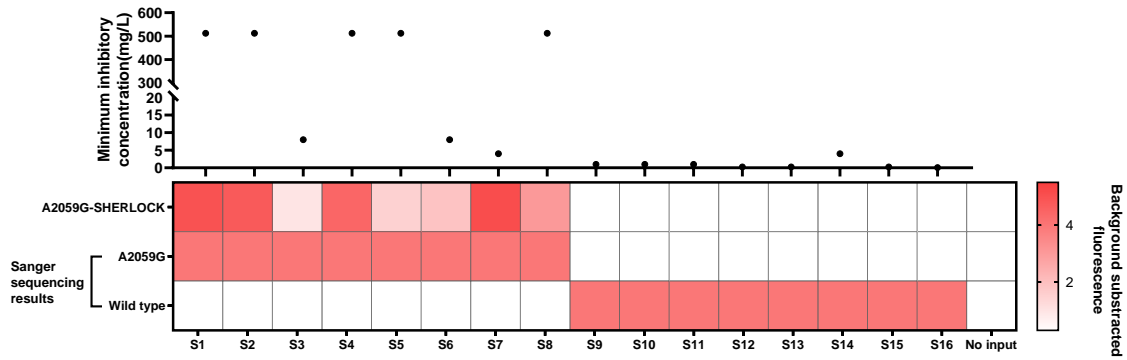

599

600

601 **Fig. 4** Evaluation of the SHERLOCK assay for C2611T point mutation detection.

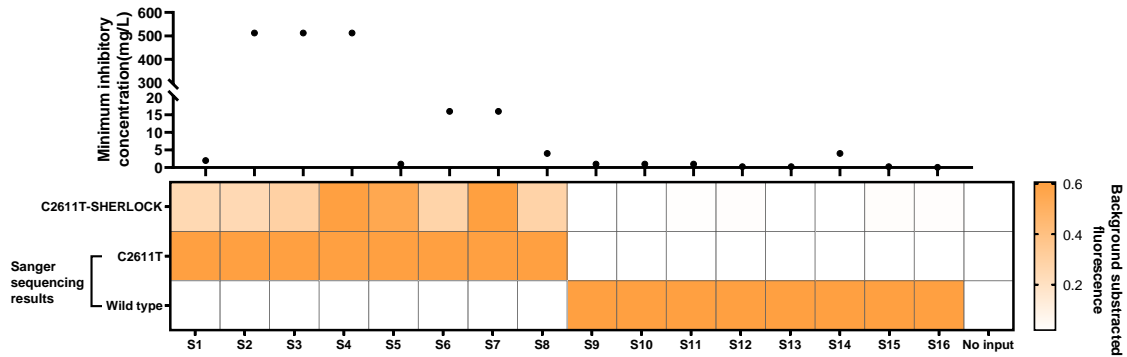

602

603

604

605

606

607 **Fig. 5** The SHERLOCK assay using lateral flow readout for the detection of *N.*

608 *gonorrhoeae*.

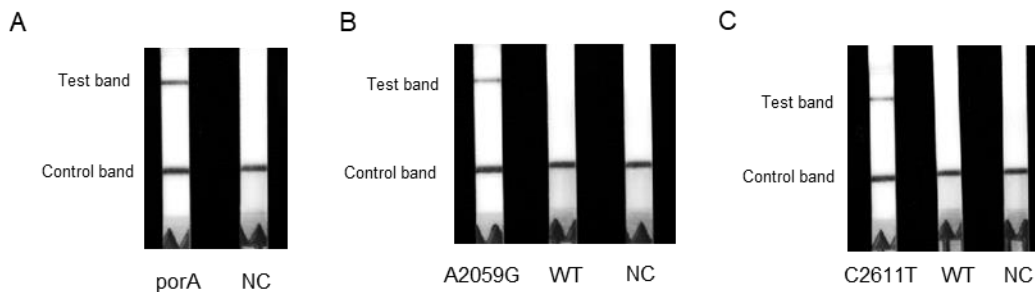

609

610

611 **Fig. 6** Fluorescence intensity of *N. gonorrhoeae* SHERLOCK assay for the detection of

612 gonococcal urethritis.

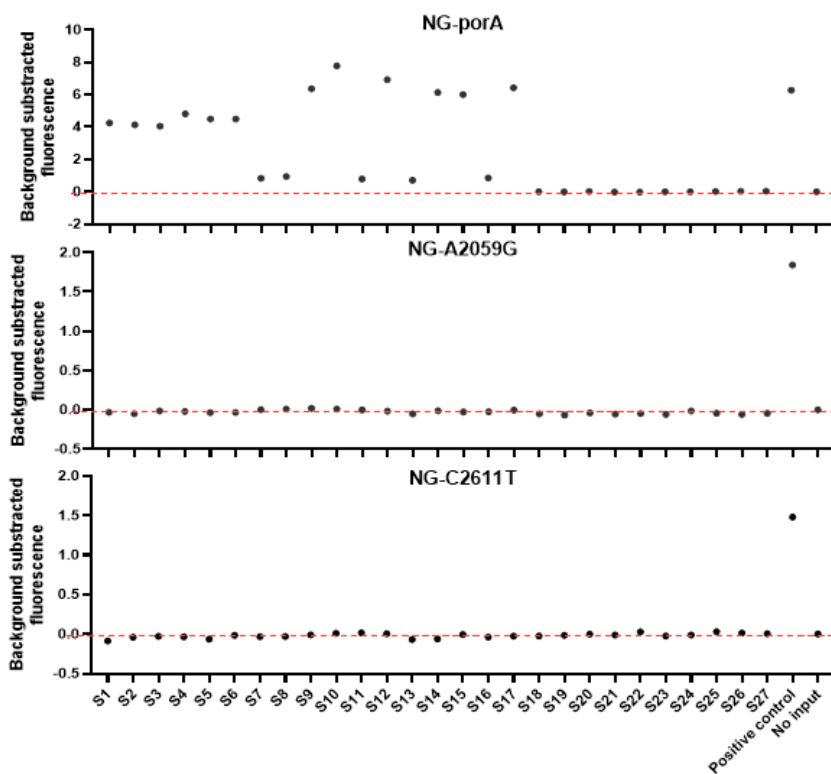

613

614 **Table**

615 **TABLE 1** LODs of *porA* detection and 23S rRNA point mutation identification (copies

616 per reaction)

| Assay  | 10 <sup>4</sup> | 10 <sup>3</sup> | 10 <sup>2</sup> | 10 <sup>1</sup> | 10 <sup>0</sup> | Wild type <sup>a</sup> |
|--------|-----------------|-----------------|-----------------|-----------------|-----------------|------------------------|
| porA   | 3/3             | 3/3             | 3/3             | 3/3             | 0/3             | N/A                    |
| A2059G | 3/3             | 3/3             | 3/3             | 0/3             | 0/3             | 0/3                    |
| C2611T | 3/3             | 3/3             | 3/3             | 3/3             | 0/3             | 0/3                    |

617 <sup>a</sup>N/A, not applicable

618

619 **TABLE 2** Specificity of porA detection and 23S rRNA point mutation identification

| Organism                       | Assay <sup>a</sup> |        |        |
|--------------------------------|--------------------|--------|--------|
|                                | porA               | A2059G | C2611T |
| porA                           | Pos                | N/A    | N/A    |
| A2059G template                | N/A                | Pos    | Neg    |
| C2611T template                | N/A                | Neg    | Pos    |
| <i>Neisseria Meningitidis</i>  | Neg                | Neg    | Neg    |
| <i>Treponema pallidum</i>      | Neg                | Neg    | Neg    |
| <i>Herpes Simplex Virus-1</i>  | Neg                | Neg    | Neg    |
| <i>Herpes Simplex Virus-2</i>  | Neg                | Neg    | Neg    |
| <i>Human Papilloma Virus-2</i> | Neg                | Neg    | Neg    |
| <i>Human Papilloma Virus-7</i> | Neg                | Neg    | Neg    |
| <i>Candida Albicans</i>        | Neg                | Neg    | Neg    |
| <i>Trichomonas Vaginalis</i>   | Neg                | Neg    | Neg    |
| <i>Chlamydia Trachomatis</i>   | Neg                | Neg    | Neg    |
| <i>Ureaplasma Urealyticum</i>  | Neg                | Neg    | Neg    |
| <i>Mycoplasma Humanum</i>      | Neg                | Neg    | Neg    |
| <i>Escherichia Coli</i>        | Neg                | Neg    | Neg    |
| <i>Enterococcus Faecalis</i>   | Neg                | Neg    | Neg    |

620 <sup>a</sup>Pos, positive; Neg, negative; N/A, not applicable.

621

622 **Supplementary Data**

623 **Figure**

624 **Fig. S1** Schematic diagram illustrating the crRNA design for the detection A2059G and  
625 C2611T.

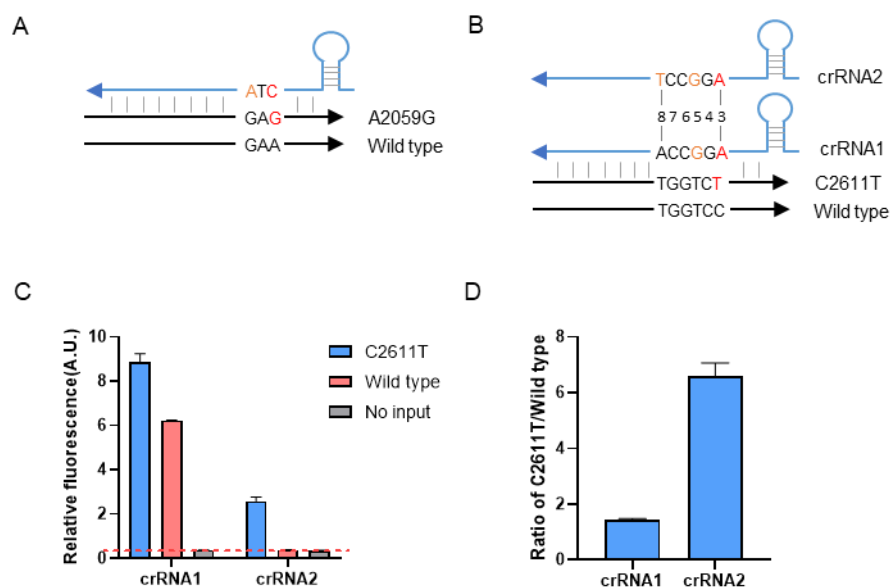

626

627

628

629

630

631 **Fig. S2** Sensitivity and specificity of the SHERLOCK assay for the detection of porA,

632 A2059G, and C2611T.



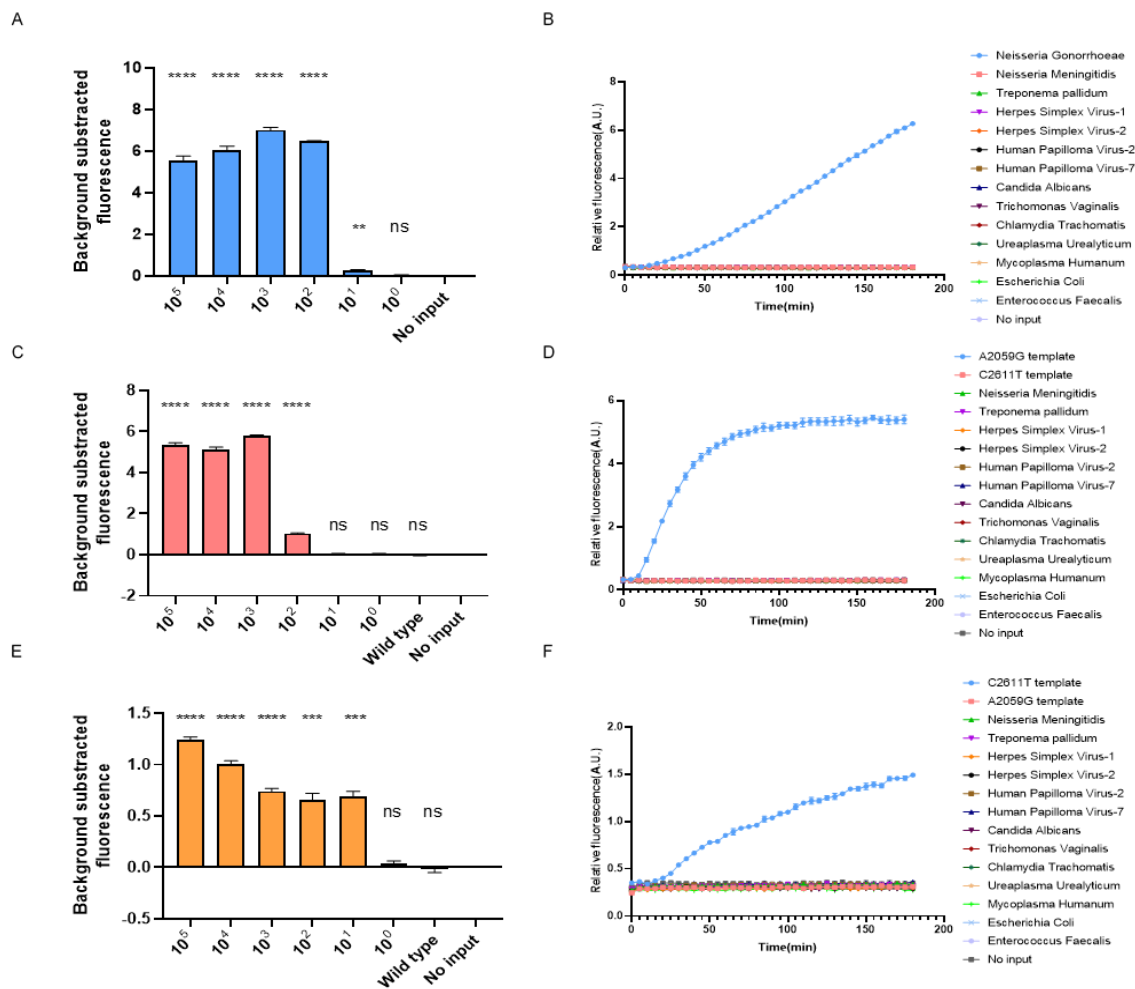

633

634

635

636

637

638 **Fig. S3** Fluorescence intensity relative to azithromycin resistance mutation strain

639 detection.

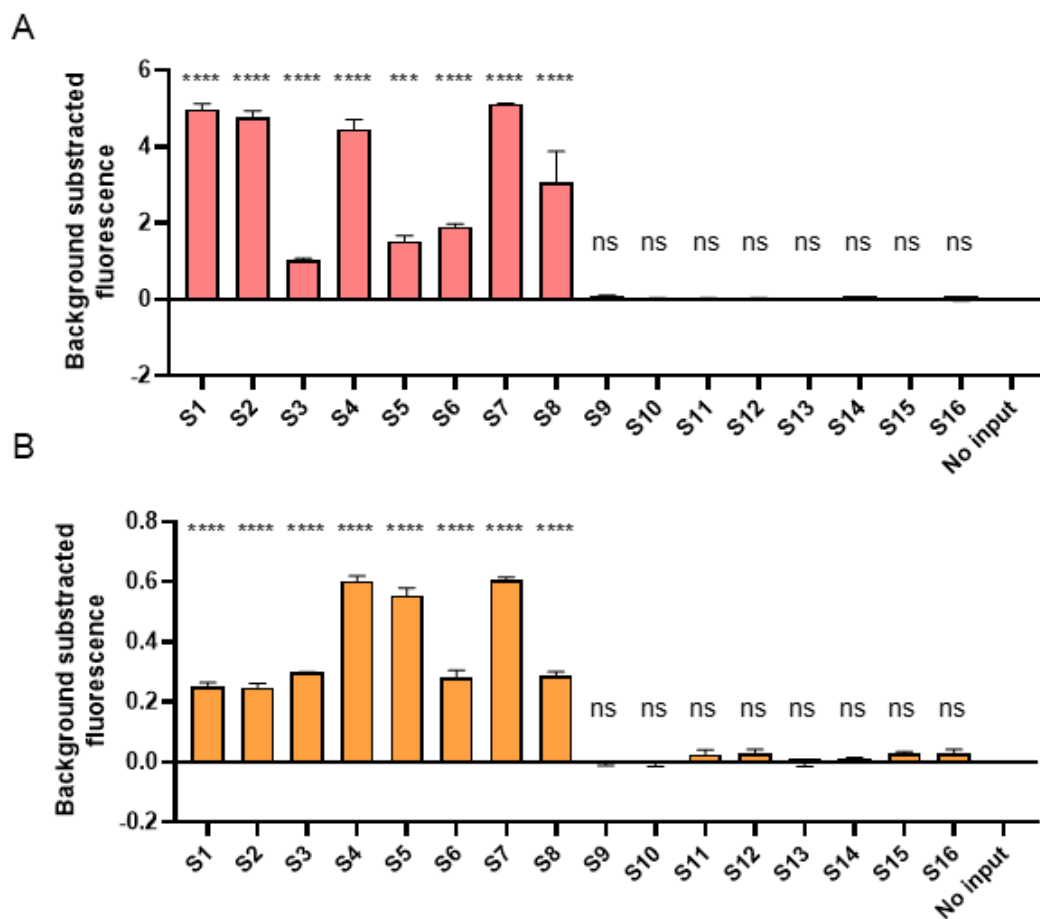

640

641

642

643

644

645

646

647 **Table**

648 **Table S1** Applying *Neisseria gonorrhoeae* SHERLOCK for detection of urethritis

| Sample ID | Clinical diagnosis | Assay <sup>a</sup> |        |        | Sanger sequencing <sup>a,b</sup> |
|-----------|--------------------|--------------------|--------|--------|----------------------------------|
|           |                    | poA                | A2059G | C2611T |                                  |
| S1        | urethritis         | Pos                | Neg    | Neg    | WT                               |
| S2        | urethritis         | Pos                | Neg    | Neg    | WT                               |
| S3        | urethritis         | Pos                | Neg    | Neg    | WT                               |
| S4        | urethritis         | Pos                | Neg    | Neg    | WT                               |
| S5        | urethritis         | Pos                | Neg    | Neg    | WT                               |
| S6        | urethritis         | Pos                | Neg    | Neg    | WT                               |
| S7        | urethritis         | Pos                | Neg    | Neg    | WT                               |
| S8        | urethritis         | Pos                | Neg    | Neg    | WT                               |
| S9        | urethritis         | Pos                | Neg    | Neg    | WT                               |
| S10       | urethritis         | Pos                | Neg    | Neg    | WT                               |
| S11       | urethritis         | Pos                | Neg    | Neg    | WT                               |
| S12       | urethritis         | Pos                | Neg    | Neg    | WT                               |
| S13       | urethritis         | Pos                | Neg    | Neg    | WT                               |
| S14       | urethritis         | Pos                | Neg    | Neg    | WT                               |
| S15       | urethritis         | Pos                | Neg    | Neg    | WT                               |
| S16       | urethritis         | Pos                | Neg    | Neg    | WT                               |
| S17       | urethritis         | Pos                | Neg    | Neg    | WT                               |
| S18       | urethritis         | Neg                | Neg    | Neg    | N/A                              |
| S19       | urethritis         | Neg                | Neg    | Neg    | N/A                              |
| S20       | urethritis         | Neg                | Neg    | Neg    | N/A                              |
| S21       | urethritis         | Neg                | Neg    | Neg    | N/A                              |
| S22       | urethritis         | Neg                | Neg    | Neg    | N/A                              |
| S23       | urethritis         | Neg                | Neg    | Neg    | N/A                              |
| S24       | urethritis         | Neg                | Neg    | Neg    | N/A                              |
| S25       | urethritis         | Neg                | Neg    | Neg    | N/A                              |
| S26       | urethritis         | Neg                | Neg    | Neg    | N/A                              |
| S27       | urethritis         | Neg                | Neg    | Neg    | N/A                              |

649 <sup>a</sup>Pos, positive; Neg, negative; N/A, not applicable.

650 <sup>b</sup>WT, 23S rRNA wild type strain

651

652 **Table S2** Primer and crRNA sequences

| Sequence ID      | Target gene | Sequences (5'-3')                                               | Application in this study |
|------------------|-------------|-----------------------------------------------------------------|---------------------------|
| porA-RPA-F       | porA        | GAAATTAATACGACTCACTATAGGGCCGGAAGTGGTTTCATCTGATT                 | RPA                       |
| porA-RPA-R       | porA        | GATTTTCCGGTTTCAGCGGCAGCATTCAAT                                  | RPA                       |
| porA-crRNA       | porA        | GATTTAGACTACCCCAAAAACGAAGGGGACTAAAACCCGAGTCAAACAGCAAGTCCGCCTATA | CRISPR/Cas 13a            |
| A2059G-RPA-F     | A2059G      | GAAATTAATACGACTCACTATAGGGTCAGCGAAGTTGAAGTGGTTGTGAAGATGC         | RPA                       |
| A2059G-RPA-R     | A2059G      | TACACAAGTGACTTCAAAGTCCAATGCAAAG                                 | RPA                       |
| A2059G-crRNA A   | A2059G      | GATTTAGACTACCCCAAAAACGAAGGGGACTAAAACCTCTACGTCTAGCAGCGGGTAGATTG  | CRISPR/Cas 13a            |
| C2611T-RPA-F     | C2611T      | GAAATTAATACGACTCACTATAGGGCCCAAGGTATGGCTGTTCCGTCATTAAAG          | RPA                       |
| C2611T-RPA-R     | C2611T      | TTACAACCGGTACACCAGAGGTTTCGTCCAC                                 | RPA                       |
| C2611T-crRNA A-1 | C2611T      | GATTTAGACTACCCCAAAAACGAAGGGGACTAAAACAGAGGCCAAACTGTCTCACGACGTTT  | CRISPR/Cas 13a            |
| C2611T-crRNA A-2 | C2611T      | GATTTAGACTACCCCAAAAACGAAGGGGACTAAAACAGAGGCCAAACTGTCTCACGACGTTT  | CRISPR/Cas 13a            |
| porA-F           | porA        | ATTCAGACCGGCATAATACACATCC                                       | PCR                       |
| porA-R           | porA        | TAATGTGGCTTCGCAATTGGGT                                          | PCR                       |
| A2059G-F         | A2059G      | GTGCCGGAAGGTTAATTGAA                                            | PCR                       |
| A2059G-R         | A2059G      | CAGGGTGGTATTCAAGGAC                                             | PCR                       |
| C2611T-F         | C2611T      | CTGCGAGACCGACAAGTC                                              | PCR                       |
| C2611T-R         | C2611T      | GTCTCGAACGACCCTTTAG                                             | PCR                       |
| 23SrRNA-F        | 23SrRNA     | ACGAATGGCGTAACGATGGCCACA                                        | Sequencing <sup>1</sup>   |
| 23SrRNA-R        | 23SrRNA     | TTCGTCCACTCCGGTCTCTCGTA                                         | Sequencing <sup>1</sup>   |

653 **1.** Ng LK, Martin I, Liu G, Bryden L. Mutation in 23S rRNA associated with macrolide

654 resistance in *Neisseria gonorrhoeae*. *Antimicrob Agents Chemother.* 2002

655 Sep;46(9):3020-5

656

657
